# Supplementary material for: Dissection of the Regulatory Elements of the Complex Expression Pattern of Puckered, a Dual-Specificity JNK Phosphatase
Source: Int J Mol Sci. 2021 Nov 11;22(22):12205. doi: 10.3390/ijms222212205 (PMC8623796; doi:10.3390/ijms222212205)
Supplement: Supplementary file 1 [file ijms-22-12205-s001.zip]

Archive with 9 entries (9 files):
- Enhancers Paper 6 Sup.pdf
- Figure S1.tif
- Figure S2.tif
- Figure S3.tif
- Figure S4.tif
- Figure S5.tif
- Figure S6.tif
- Table S1.xlsx
- Table S2.xlsx
