# Supplementary material for: Dissection of the Regulatory Elements of the Complex Expression Pattern of Puckered, a Dual-Specificity JNK Phosphatase
Source: Int J Mol Sci. 2021 Nov 11;22(22):12205. doi: 10.3390/ijms222212205 (PMC8623796; doi:10.3390/ijms222212205)
Supplement: Supplementary file 1 [file ijms-22-12205-s001.zip › Table S1.xlsx]

## Sheet: Sheet1
Table S1
Matrix ID	Name	Score	Relative score	Sequence ID	Start	End	Strand	Predicted sequence
MA0173,1	CG11617	104776	0.959704	RS1	6	12	-	TTTACAT
MA0217,1	caup	599802	0.901139	RS1	7	11	-	TTACA
MA0233,1	mirr	630465	0.931774	RS1	7	11	-	TTACA
MA0210,1	ara	654466	0.954475	RS1	7	11	-	TTACA
MA0086,1	sna	727808	0.876118	RS1	19	24	+	CAGGTT
MA0253,1	vnd	900443	0.876602	RS1	25	33	+	TCTCAAGCG
MA0247,2	tin	86978	0.882853	RS1	25	34	+	TCTCAAGCGG
MA0247,1	tin	840121	0.868418	RS1	26	33	+	CTCAAGCG
MA0022,1	dl	129561	0.934593	RS1	45	56	-	CGGGTTTTTCAG
MA0023,1	dl(var,2)	966178	0.864633	RS1	46	55	-	GGGTTTTTCA
MA0917,1	gcm2	61429	0.857607	RS1	52	59	-	AAGCGGGT
MA0222,1	exd	735658	0.859172	RS1	57	64	+	CTTTGAAA
MA0237,1	pan	863825	0.943276	RS1	57	64	+	CTTTGAAA
MA0204,1	Six4	641459	0.86925	RS1	60	65	+	TGAAAC
MA0247,2	tin	702919	0.852941	RS1	70	79	+	TTTCGAGTAC
MA0253,1	vnd	886739	0.872579	RS1	70	78	+	TTTCGAGTA
MA0254,1	vvl	559701	0.872255	RS1	77	82	+	TACGAA
MA0185,1	Deaf1	632093	0.924901	RS1	77	82	-	TTCGTA
MA0243,1	hb	848367	0.866293	RS2	4	13	+	ACGCAAAAAA
MA0018,3	Deaf1	670139	0.945026	RS2	19	24	-	CTCGTG
MA0227,1	SP1	830166	0.885585	RS2	21	31	-	TTCCCACCTCG
MA0166,1	sna	676968	0.857948	RS2	22	27	+	GAGGTG
MA1127,1	Deaf1	592175	0.903787	RS2	30	35	-	CTCGTT
MA1131,1	Trl	807327	0.868681	RS2	34	43	-	GTTCTCTCCT
MA1632,1	sd	746223	0.864798	RS2	49	60	-	TATATTCCACGG
MA0656,1	Ubx	420453	0.851036	RS2	58	61	-	TTAT
MA0018,3	Ubx	691669	1	RS2	59	62	+	TAAT
MA0605,1	JUN	681265	0.861917	RS2	61	73	+	ATGCTGACGTCAA
MA1475,1	CREB1	116001	0.900033	RS2	62	74	+	TGCTGACGTCAAT
MA0244,1	ATF2	996977	0.874436	RS2	62	74	+	TGCTGACGTCAAT
MA0609,1	CREB1	132127	0.932483	RS2	63	74	+	GCTGACGTCAAT
MA0609,1	CREB1	132127	0.932483	RS2	63	74	-	ATTGACGTCAGC
MA0604,1	Crem	113572	0.920299	RS2	63	72	+	GCTGACGTCA
MA1475,1	FOSB::JUN	127235	0.897884	RS2	63	73	+	GCTGACGTCAA
MA0018,4	CREB3L4(var,2)	115548	0.893655	RS2	63	74	+	GCTGACGTCAAT
MA1140,1	CREB3L4(var,2)	114599	0.891915	RS2	63	74	-	ATTGACGTCAGC
MA1140,1	CREB1	111125	0.890156	RS2	63	75	-	GATTGACGTCAGC
MA0049,1	Creb5	888098	0.869889	RS2	63	74	+	GCTGACGTCAAT
MA0183,1	Creb5	849203	0.864834	RS2	63	74	-	ATTGACGTCAGC
MA1131,1	JUN::JUNB(var,2)	105929	0.863471	RS2	63	74	+	GCTGACGTCAAT
MA0488,1	ATF2	920402	0.862804	RS2	63	75	-	GATTGACGTCAGC
MA1139,1	FOSL2::JUN(var,2)	987315	0.862598	RS2	63	73	+	GCTGACGTCAA
MA0182,1	FOSL2::JUNB(var,2)	10324	0.862535	RS2	63	74	-	ATTGACGTCAGC
MA0656,1	FOSL2::JUNB(var,2)	102554	0.861339	RS2	63	74	+	GCTGACGTCAAT
MA0222,1	Atf3	72879	0.860704	RS2	63	70	+	GCTGACGT
MA0089,1	JDP2(var,2)	731035	0.859548	RS2	63	74	+	GCTGACGTCAAT
MA0233,1	MAFG::NFE2L1	555264	0.858828	RS2	63	68	+	GCTGAC
MA0222,1	ATF3	570328	0.856042	RS2	63	74	+	GCTGACGTCAAT
MA0203,1	ATF3	539176	0.85285	RS2	63	74	-	ATTGACGTCAGC
MA0018,4	Atf1	865019	0.905317	RS2	64	71	+	CTGACGTC
MA0011,1	JUNB(var,2)	104732	0.886289	RS2	64	73	-	TTGACGTCAG
MA0227,1	JUNB(var,2)	104204	0.88499	RS2	64	73	+	CTGACGTCAA
MA1133,1	FOSL2::JUN(var,2)	100459	0.86566	RS2	64	74	-	ATTGACGTCAG
MA0605,2	FOSL1::JUND(var,2)	850953	0.858547	RS2	64	73	+	CTGACGTCAA
MA0185,1	CREB1	115686	1	RS2	65	72	+	TGACGTCA
MA0210,1	CREB1	115686	1	RS2	65	72	-	TGACGTCA
MA0185,1	Crem	108103	0.909302	RS2	65	74	-	ATTGACGTCA
MA0215,1	hth	703607	0.883918	RS2	65	70	+	TGACGT
MA0604,1	CREB1	103157	0.903023	RS2	66	77	-	GCGATTGACGTC
MA0217,1	Atf1	828501	0.897426	RS2	66	73	-	TTGACGTC
MA1632,1	hth	703607	0.883918	RS2	67	72	-	TGACGT
MA1143,1	exd	735391	0.859076	RS2	68	75	-	GATTGACG
MA0448,1	slbo	703384	0.870887	RS2	80	87	-	ATGGAAAA
MA0840,1	br(var,2)	727783	0.872537	RS2	82	89	+	TTCCATTT
MA0205,1	br(var,2)	727783	0.872537	RS2	88	95	+	TTCCATTT
MA0165,1	CG4328-RA	546614	0.860853	RS2	90	96	-	AAAATGG
MA0167,1	br(var,2)	754413	0.884088	RS2	95	102	+	TTCTATGT
MA0018,1	exd	71496	0.85174	RS2	100	107	-	TTTGGACA
MA0018,1	pan	76626	0.907587	RS2	101	108	-	CTTTGGAC
MA0174,1	ara	616824	0.936868	RS2	110	114	-	GAACA
MA0079,3	caup	579863	0.890673	RS2	110	114	-	GAACA
MA0605,2	mirr	471831	0.858035	RS2	110	114	-	GAACA
MA0237,1	Dbx	793488	0.925484	RS2	113	119	-	TTGATGA
MA0011,1	Awh	733885	0.877827	RS2	113	119	-	TTGATGA
MA0011,1	btn	747073	0.877463	RS2	113	119	-	TTGATGA
MA0840,1	H2,0	603484	0.866511	RS2	113	119	-	TTGATGA
MA0195,1	Abd-B	648032	0.859332	RS2	113	119	-	TTGATGA
MA0086,1	Lim3	629049	0.858633	RS2	113	119	-	TTGATGA
MA0094,1	Antp	723771	0.851789	RS2	113	119	-	TTGATGA
MA0197,1	Scr	70055	0.85107	RS2	113	119	-	TTGATGA
MA1139,1	HHEX	673486	0.862825	RS2	115	122	+	ATCAAGTA
MA0213,1	caup	523446	0.861061	RS3	2	6	-	CAACA
MA0535,1	mirr	471831	0.858035	RS3	2	6	-	CAACA
MA1460,1	caup	523446	0.861061	RS3	5	9	-	CAACA
MA0213,1	mirr	471831	0.858035	RS3	5	9	-	CAACA
MA0217,1	caup	523446	0.861061	RS3	11	15	-	CAACA
MA0217,1	mirr	471831	0.858035	RS3	11	15	-	CAACA
MA0217,1	caup	523446	0.861061	RS3	18	22	-	CAACA
MA0217,1	mirr	471831	0.858035	RS3	18	22	-	CAACA
MA0233,1	schlank	603237	0.850101	RS3	26	32	-	CTGCCAA
MA0233,1	mirr	468519	0.856496	RS3	31	35	+	AGACA
MA0233,1	pho	922946	0.865251	RS3	36	46	+	GCATGGCGGCA
MA0233,1	brk	703596	0.861704	RS3	40	47	-	CTGCCGCC
MA0233,1	Mad	101576	0.878001	RS3	42	56	-	ACGACGCCGCTGCCG
MA0193,1	brk	773431	0.887317	RS3	47	54	+	GCGGCGTC
MA0506,1	Atf3	897736	0.895701	RS4	1	8	+	GGTGACAT
MA0195,1	MAFG::NFE2L1	591912	0.8747	RS4	1	6	+	GGTGAC
MA0187,1	hth	894159	0.96427	RS4	3	8	+	TGACAT
MA0049,1	vis	82913	0.933696	RS4	3	8	+	TGACAT
MA0049,1	achi	818566	0.918683	RS4	3	8	+	TGACAT
MA0200,1	caup	55935	0.879906	RS4	3	7	+	TGACA
MA0173,1	mirr	461681	0.853317	RS4	3	7	+	TGACA
MA0217,1	sd	739911	0.862704	RS4	4	15	+	GACATTTTTGTT
MA1132,1	hb	938414	0.894035	RS4	7	16	-	CAACAAAAAT
MA0197,1	cad	957565	0.902537	RS4	8	18	-	GCCAACAAAAA
MA0018,1	hb	858321	0.869359	RS4	8	17	-	CCAACAAAAA
MA0197,2	pan	627693	0.8569	RS4	9	16	+	TTTTGTTG
MA1142,1	cad	655931	0.865507	RS4	10	16	+	TTTGTTG
MA0193,1	schlank	675776	0.876928	RS4	11	17	-	CCAACAA
MA0089,1	caup	523446	0.861061	RS4	12	16	-	CAACA
MA0237,1	mirr	471831	0.858035	RS4	12	16	-	CAACA
MA0233,1	NRF1	619422	0.853485	RS4	17	27	+	GCCCCCGTGCG
MA0049,1	NRF1	94838	0.89411	RS4	19	29	+	CCCCGTGCGCA
MA0605,1	nub	796742	0.897456	RS4	28	35	+	CATAATTT
MA0252,1	PHDP	846632	0.940452	RS4	29	35	+	ATAATTT
MA0193,1	Pph13	747694	0.877705	RS4	29	35	+	ATAATTT
MA0243,1	nub	109604	0.854554	RS4	29	40	-	TATTGAAATTAT
MA0224,1	Ubx	420453	0.851036	RS4	29	32	-	TTAT
MA0185,1	Ubx	691669	1	RS4	30	33	+	TAAT
MA0049,1	Dll	89745	0.958924	RS4	30	36	+	TAATTTC
MA0049,1	Lim3	661865	0.871455	RS4	30	36	-	GAAATTA
MA0216,1	CG4328-RA	563618	0.867208	RS4	30	36	-	GAAATTA
MA0248,1	exex	683846	0.850094	RS4	30	36	-	GAAATTA
MA0457,1	CG4328-RA	760393	0.940747	RS4	36	42	-	AATATTG
MA0506,1	sd	713558	0.85396	RS4	37	48	+	AATATTCGTCAG
MA0604,1	JUN::JUNB	985481	0.889161	RS4	40	49	-	GCTGACGAAT
MA0243,1	FOSL1::JUND	803886	0.863502	RS4	40	49	-	GCTGACGAAT
MA0233,1	FOS::JUN	830338	0.858699	RS4	40	49	+	ATTCGTCAGC
MA0227,1	Deaf1	740292	0.982133	RS4	41	46	+	TTCGTC
MA0217,1	Atf1	783066	0.887609	RS4	41	48	-	CTGACGAA
MA0182,1	CREB1	904896	0.868972	RS4	41	52	-	CCGGCTGACGAA
MA0099,3	MAFG::NFE2L1	555264	0.858828	RS4	44	49	-	GCTGAC
MA0244,1	CG11617	748157	0.853122	RS4	59	65	+	TTAAAAT
MA0094,1	slbo	653187	0.851094	RS4	63	70	+	AATGCAAA
MA0089,1	schlank	673832	0.876209	RS4	74	80	+	CGACCAA
MA0182,1	hb	109755	0.943065	RS4	81	90	+	GCGAAAAAAA
MA0216,2	hb	98056	0.90702	RS4	82	91	+	CGAAAAAAAA
MA0207,1	hb	10291	0.921976	RS4	83	92	+	GAAAAAAAAT
