# Supplementary material for: Dissection of the Regulatory Elements of the Complex Expression Pattern of Puckered, a Dual-Specificity JNK Phosphatase
Source: Int J Mol Sci. 2021 Nov 11;22(22):12205. doi: 10.3390/ijms222212205 (PMC8623796; doi:10.3390/ijms222212205)
Supplement: Supplementary file 1 [file ijms-22-12205-s001.zip › Table S2.xlsx]

## Sheet: Sheet1
Table S2
ID	Name	Species	Class	Family
MA0010.1	br	Drosophila melanogaster	C2H2 zinc finger factors	Other factors with up to three adjacent zinc fingers
MA0011.1	br(var.2)	Drosophila melanogaster	C2H2 zinc finger factors	Other factors with up to three adjacent zinc fingers
MA0012.1	br(var.3)	Drosophila melanogaster	C2H2 zinc finger factors	Other factors with up to three adjacent zinc fingers
MA0013.1	br(var.4)	Drosophila melanogaster	C2H2 zinc finger factors	Other factors with up to three adjacent zinc fingers
MA0015.1	Cf2	Drosophila melanogaster	C2H2 zinc finger factors	Factors with multiple dispersed zinc fingers
MA0016.1	usp	Drosophila melanogaster	Nuclear receptors with C4 zinc fingers
MA0018.1	CREB1	Homo sapiens	Basic leucine zipper factors (bZIP)	CREB-related factors
MA0018.2	CREB1	Mus musculus/Rattus norvegicus/Homo sapiens	Basic leucine zipper factors (bZIP)	CREB-related factors
MA0018.3	CREB1	Homo sapiens	Basic leucine zipper factors (bZIP)	CREB-related factors
MA0018.4	CREB1	Homo sapiens	Basic leucine zipper factors (bZIP)	CREB-related factors
MA0022.1	dl	Drosophila melanogaster	Rel homology region (RHR) factors
MA0023.1	dl(var.2)	Drosophila melanogaster	Rel homology region (RHR) factors
MA0026.1	Eip74EF	Drosophila melanogaster	Tryptophan cluster factors	Ets-related factors
MA0049.1	hb	Drosophila melanogaster	C2H2 zinc finger factors	Factors with multiple dispersed zinc fingers
MA0079.1	SP1	Homo sapiens	C2H2 zinc finger factors	Three-zinc finger Krüppel-related factors
MA0079.2	SP1	Mus musculus/Rattus norvegicus/Homo sapiens	C2H2 zinc finger factors	Three-zinc finger Krüppel-related factors
MA0079.3	SP1	Homo sapiens	C2H2 zinc finger factors	Three-zinc finger Krüppel-related factors
MA0079.4	SP1	Homo sapiens	C2H2 zinc finger factors	Three-zinc finger Kruppel-related factors
MA0083.2	SRF	Homo sapiens	MADS box factors	Responders to external signals (SRF/RLM1)
MA0085.1	Su(H)	Drosophila melanogaster
MA0086.1	sna	Drosophila melanogaster	C2H2 zinc finger factors	More than 3 adjacent zinc finger factors
MA0086.2	sna	Drosophila melanogaster	C2H2 zinc finger factors	More than 3 adjacent zinc finger factors
MA0089.1	MAFG::NFE2L1	Gallus gallus	Basic leucine zipper factors (bZIP)::Basic leucine zipper factors (bZIP)	Maf-related factors::Jun-related factors
MA0089.2	NFE2L1	Homo sapiens	Basic leucine zipper factors (bZIP)	Jun-related factors
MA0094.1	Ubx	Drosophila melanogaster	Homeo domain factors	HOX-related factors
MA0094.2	Ubx	Drosophila melanogaster	Homeo domain factors	HOX-related factors
MA0099.1	JUN::FOS	Mus musculus	Basic leucine zipper factors (bZIP)::Basic leucine zipper factors (bZIP)	Fos-related factors::Jun-related factors
MA0099.2	FOS::JUN	Mus musculus/Rattus norvegicus/Homo sapiens	Basic leucine zipper factors (bZIP)::Basic leucine zipper factors (bZIP)	Fos-related factors::Jun-related factors
MA0099.3	FOS::JUN	Homo sapiens	Basic leucine zipper factors (bZIP)::Basic leucine zipper factors (bZIP)	Fos-related factors::Jun-related factors
MA0111.1	Spz1	Mus musculus	Basic helix-loop-helix factors (bHLH)
MA0126.1	ovo	Drosophila melanogaster	C2H2 zinc finger factors	More than 3 adjacent zinc finger factors
MA0150.1	NFE2L2	Homo sapiens	Basic leucine zipper factors (bZIP)	Jun-related factors
MA0150.2	Nfe2l2	Mus musculus	Basic leucine zipper factors (bZIP)	Jun-related factors
MA0165.1	Abd-B	Drosophila melanogaster	Homeo domain factors	HOX-related factors
MA0166.1	Antp	Drosophila melanogaster	Homeo domain factors	HOX-related factors
MA0167.1	Awh	Drosophila melanogaster	Homeo domain factors
MA0168.1	B-H1	Drosophila melanogaster	Homeo domain factors	HOX-related factors
MA0169.1	B-H2	Drosophila melanogaster	Homeo domain factors	HOX-related factors
MA0170.1	C15	Drosophila melanogaster	Homeo domain factors
MA0171.1	CG11085	Drosophila melanogaster	Homeo domain factors
MA0172.1	CG11294	Drosophila melanogaster	Homeo domain factors
MA0173.1	CG11617	Drosophila melanogaster	Homeo domain factors
MA0174.1	Dbx	Drosophila melanogaster	Homeo domain factors
MA0175.1	lms	Drosophila melanogaster	Homeo domain factors
MA0176.1	CG15696-RA	Drosophila melanogaster	Homeo domain factors
MA0177.1	CG18599	Drosophila melanogaster	Homeo domain factors
MA0178.1	CG32105	Drosophila melanogaster	Homeo domain factors
MA0179.1	CG32532	Drosophila melanogaster	Homeo domain factors
MA0180.1	Vsx2	Drosophila melanogaster	Homeo domain factors	Paired-related HD factors
MA0181.1	Vsx1	Drosophila melanogaster	Homeo domain factors	Paired-related HD factors
MA0182.1	CG4328-RA	Drosophila melanogaster	Homeo domain factors
MA0183.1	HHEX	Drosophila melanogaster	Homeo domain factors
MA0184.1	CG9876	Drosophila melanogaster	Homeo domain factors
MA0185.1	Deaf1	Drosophila melanogaster	SAND domain factors	DEAF
MA0186.1	Dfd	Drosophila melanogaster	Homeo domain factors	HOX-related factors
MA0187.1	Dll	Drosophila melanogaster	Homeo domain factors
MA0188.1	Dr	Drosophila melanogaster	Homeo domain factors	NK-related factors
MA0189.1	E5	Drosophila melanogaster	Homeo domain factors
MA0190.1	Gsc	Drosophila melanogaster	Homeo domain factors	Paired-related HD factors
MA0191.1	HGTX	Drosophila melanogaster	Homeo domain factors	NK-related factors
MA0192.1	Hmx	Drosophila melanogaster	Homeo domain factors	NK-related factors
MA0193.1	schlank	Drosophila melanogaster	Homeo domain factors
MA0194.1	Lim1	Drosophila melanogaster	Homeo domain factors	HD-LIM factors
MA0195.1	Lim3	Drosophila melanogaster	Homeo domain factors	HD-LIM factors
MA0196.1	NK7.1	Drosophila melanogaster	Homeo domain factors	NK-related factors
MA0197.1	nub	Drosophila melanogaster	Homeo domain factors	POU domain factors
MA0197.2	nub	Drosophila melanogaster	Homeo domain factors	POU domain factors
MA0198.1	OdsH	Drosophila melanogaster	Homeo domain factors	Paired-related HD factors
MA0199.1	Optix	Drosophila melanogaster	Homeo domain factors	HD-SINE factors
MA0200.1	Pph13	Drosophila melanogaster	Homeo domain factors
MA0201.1	Ptx1	Drosophila melanogaster	Homeo domain factors	Paired-related HD factors
MA0202.1	Rx	Drosophila melanogaster	Homeo domain factors	Paired-related HD factors
MA0203.1	Scr	Drosophila melanogaster	Homeo domain factors	HOX-related factors
MA0204.1	Six4	Drosophila melanogaster	Homeo domain factors	HD-SINE factors
MA0205.1	Trl	Drosophila melanogaster	C2H2 zinc finger factors
MA0205.2	Trl	Drosophila melanogaster	C2H2 zinc finger factors
MA0206.1	abd-A	Drosophila melanogaster	Homeo domain factors	HOX-related factors
MA0207.1	achi	Drosophila melanogaster	Homeo domain factors
MA0208.1	al	Drosophila melanogaster	Homeo domain factors	Paired-related HD factors
MA0209.1	ap	Drosophila melanogaster	Homeo domain factors
MA0210.1	ara	Drosophila melanogaster	Homeo domain factors	TALE-type homeo domain factors
MA0211.1	bap	Drosophila melanogaster	Homeo domain factors	NK-related factors
MA0212.1	bcd	Drosophila melanogaster	Homeo domain factors	Paired-related HD factors
MA0213.1	brk	Drosophila melanogaster
MA0214.1	bsh	Drosophila melanogaster	Homeo domain factors	NK-related factors
MA0215.1	btn	Drosophila melanogaster	Homeo domain factors
MA0216.1	cad	Drosophila melanogaster	Homeo domain factors	HOX-related factors
MA0216.2	cad	Drosophila melanogaster	Homeo domain factors	HOX-related factors
MA0217.1	caup	Drosophila melanogaster	Homeo domain factors	TALE-type homeo domain factors
MA0218.1	ct	Drosophila melanogaster	Homeo domain factors	HD-CUT factors
MA0219.1	ems	Drosophila melanogaster	Homeo domain factors	NK-related factors
MA0220.1	en	Drosophila melanogaster	Homeo domain factors	NK-related factors
MA0221.1	eve	Drosophila melanogaster	Homeo domain factors	HOX-related factors
MA0222.1	exd	Drosophila melanogaster	Homeo domain factors	TALE-type homeo domain factors
MA0224.1	exex	Drosophila melanogaster	Homeo domain factors
MA0225.1	ftz	Drosophila melanogaster	Homeo domain factors	HOX-related factors
MA0226.1	hbn	Drosophila melanogaster	Homeo domain factors
MA0227.1	hth	Drosophila melanogaster	Homeo domain factors	TALE-type homeo domain factors
MA0228.1	ind	Drosophila melanogaster	Homeo domain factors
MA0229.1	inv	Drosophila melanogaster	Homeo domain factors	NK-related factors
MA0230.1	lab	Drosophila melanogaster	Homeo domain factors	HOX-related factors
MA0231.1	lbe	Drosophila melanogaster	Homeo domain factors
MA0232.1	lbl	Drosophila melanogaster	Homeo domain factors
MA0233.1	mirr	Drosophila melanogaster	Homeo domain factors
MA0234.1	oc	Drosophila melanogaster	Homeo domain factors	Paired-related HD factors
MA0235.1	onecut	Drosophila melanogaster	Homeo domain factors	HD-CUT factors
MA0236.1	otp	Drosophila melanogaster	Homeo domain factors	Paired-related HD factors
MA0237.1	pan	Drosophila melanogaster	High-mobility group (HMG) domain factors	High Mobility Group box (HMG)
MA0237.2	pan	Drosophila melanogaster	High-mobility group (HMG) domain factors
MA0238.1	pb	Drosophila melanogaster	Homeo domain factors	HOX-related factors
MA0239.1	prd	Drosophila melanogaster	Paired box factors
MA0240.1	repo	Drosophila melanogaster	Homeo domain factors
MA0241.1	ro	Drosophila melanogaster	Homeo domain factors
MA0242.1	Bgb::run	Drosophila melanogaster	Runt domain factors::Runt domain factors	Runt-related factors::Runt-related factors
MA0243.1	sd	Drosophila melanogaster	TEA domain factors
MA0244.1	slbo	Drosophila melanogaster	Basic leucine zipper factors (bZIP)	C/EBP-related factors
MA0245.1	slou	Drosophila melanogaster	Homeo domain factors	NK-related factors
MA0246.1	so	Drosophila melanogaster	Homeo domain factors	HD-SINE factors
MA0247.1	tin	Drosophila melanogaster	Homeo domain factors	Homeo
MA0247.2	tin	Drosophila melanogaster	Homeo domain factors
MA0248.1	tup	Drosophila melanogaster	Homeo domain factors	HD-LIM factors
MA0249.1	twi	Drosophila melanogaster	Basic helix-loop-helix factors (bHLH)
MA0249.2	twi	Drosophila melanogaster	Basic helix-loop-helix factors (bHLH)
MA0250.1	unc-4	Drosophila melanogaster	Homeo domain factors	Paired-related HD factors
MA0251.1	unpg	Drosophila melanogaster	Homeo domain factors
MA0252.1	vis	Drosophila melanogaster	Homeo domain factors
MA0253.1	vnd	Drosophila melanogaster	Homeo domain factors	NK-related factors
MA0254.1	vvl	Drosophila melanogaster	Homeo domain factors	POU domain factors
MA0255.1	z	Drosophila melanogaster
MA0256.1	zen	Drosophila melanogaster	Homeo domain factors
MA0257.1	zen2	Drosophila melanogaster	Homeo domain factors
MA0443.1	btd	Drosophila melanogaster	C2H2 zinc finger factors	Other factors with up to three adjacent zinc fingers
MA0444.1	CG34031	Drosophila melanogaster	Homeo domain factors
MA0445.1	D	Drosophila melanogaster	High-mobility group (HMG) domain factors
MA0446.1	fkh	Drosophila melanogaster	Fork head / winged helix factors	Forkhead box (FOX) factors
MA0447.1	gt	Drosophila melanogaster	Basic leucine zipper factors (bZIP)
MA0448.1	H2.0	Drosophila melanogaster	Homeo domain factors	NK-related factors
MA0449.1	h	Drosophila melanogaster	Zipper-type	Helix-Loop-Helix
MA0450.1	hkb	Drosophila melanogaster	C2H2 zinc finger factors
MA0451.1	kni	Drosophila melanogaster	Nuclear receptors with C4 zinc fingers
MA0452.1	Kr	Drosophila melanogaster	C2H2 zinc finger factors	More than 3 adjacent zinc finger factors
MA0452.2	Kr	Drosophila melanogaster	C2H2 zinc finger factors	More than 3 adjacent zinc finger factors
MA0454.1	odd	Drosophila melanogaster	C2H2 zinc finger factors	More than 3 adjacent zinc finger factors
MA0456.1	opa	Drosophila melanogaster	C2H2 zinc finger factors	More than 3 adjacent zinc finger factors
MA0457.1	PHDP	Drosophila melanogaster	Homeo domain factors
MA0458.1	slp1	Drosophila melanogaster	Fork head / winged helix factors	Forkhead box (FOX) factors
MA0459.1	tll	Drosophila melanogaster	Nuclear receptors with C4 zinc fingers
MA0460.1	ttk	Drosophila melanogaster	C2H2 zinc finger factors	Other factors with up to three adjacent zinc fingers
MA0462.1	BATF::JUN	Homo sapiens	Basic leucine zipper factors (bZIP)::Basic leucine zipper factors (bZIP)	B-ATF-related factors::Jun-related factors
MA0462.2	BATF::JUN	Homo sapiens	Basic leucine zipper factors (bZIP)::Basic leucine zipper factors (bZIP)	B-ATF-related factors::Jun-related factors
MA0476.1	FOS	Homo sapiens	Basic leucine zipper factors (bZIP)	Fos-related factors
MA0477.1	FOSL1	Homo sapiens	Basic leucine zipper factors (bZIP)	Fos-related factors
MA0477.2	FOSL1	Homo sapiens	Basic leucine zipper factors (bZIP)	Fos-related factors
MA0478.1	FOSL2	Homo sapiens	Basic leucine zipper factors (bZIP)	Fos-related factors
MA0488.1	JUN	Homo sapiens	Basic leucine zipper factors (bZIP)	Jun-related factors
MA0489.1	JUN(var.2)	Homo sapiens	Basic leucine zipper factors (bZIP)	Jun-related factors
MA0490.1	JUNB	Homo sapiens	Basic leucine zipper factors (bZIP)	Jun-related factors
MA0490.2	JUNB	Homo sapiens	Basic leucine zipper factors (bZIP)	Jun-related factors
MA0491.1	JUND	Homo sapiens	Basic leucine zipper factors (bZIP)	Jun-related factors
MA0491.2	JUND	Homo sapiens	Basic leucine zipper factors (bZIP)	Jun-related factors
MA0492.1	JUND(var.2)	Homo sapiens	Basic leucine zipper factors (bZIP)	Jun-related factors
MA0501.1	MAF::NFE2	Homo sapiens	Basic leucine zipper factors (bZIP)::Basic leucine zipper factors (bZIP)	Maf-related factors::Jun-related factors
MA0506.1	NRF1	Homo sapiens	Basic leucine zipper factors (bZIP)	Jun-related factors
MA0526.1	USF2	Homo sapiens	Basic helix-loop-helix factors (bHLH)	bHLH-ZIP factors
MA0529.1	BEAF-32	Drosophila melanogaster
MA0529.2	BEAF-32	Drosophila melanogaster	C2H2 zinc finger factors
MA0530.1	cnc::maf-S	Drosophila melanogaster	Basic leucine zipper factors (bZIP)::Basic leucine zipper factors (bZIP)	Jun-related factors::Maf-related factors
MA0531.1	CTCF	Drosophila melanogaster	C2H2 zinc finger factors	More than 3 adjacent zinc finger factors
MA0532.1	Stat92E	Drosophila melanogaster	STAT domain factors	STAT factors
MA0533.1	su(Hw)	Drosophila melanogaster	C2H2 zinc finger factors	Factors with multiple dispersed zinc fingers
MA0534.1	EcR::usp	Drosophila melanogaster	Nuclear receptors with C4 zinc fingers::Nuclear receptors with C4 zinc fingers
MA0535.1	Mad	Drosophila melanogaster	SMAD/NF-1 DNA-binding domain factors	SMAD factors
MA0536.1	pnr	Drosophila melanogaster	Other C4 zinc finger-type factors	GATA-type zinc fingers
MA0591.1	Bach1::Mafk	Mus musculus	Basic leucine zipper factors (bZIP)::Basic leucine zipper factors (bZIP)	Jun-related factors::Maf-related factors
MA0604.1	Atf1	Mus musculus	Basic leucine zipper factors (bZIP)	CREB-related factors
MA0605.1	Atf3	Mus musculus	Basic leucine zipper factors (bZIP)	Fos-related factors
MA0605.2	ATF3	Homo sapiens	Basic leucine zipper factors (bZIP)	Jun-related factors
MA0608.1	Creb3l2	Mus musculus	Basic leucine zipper factors (bZIP)	CREB-related factors
MA0609.1	Crem	Mus musculus	Basic leucine zipper factors (bZIP)	CREB-related factors
MA0609.2	CREM	Homo sapiens	Basic leucine zipper factors (bZIP)	CREB-related factors
MA0638.1	CREB3	Homo sapiens	Basic leucine zipper factors (bZIP)	CREB-related factors
MA0655.1	JDP2	Homo sapiens	Basic leucine zipper factors (bZIP)	Fos-related factors
MA0656.1	JDP2(var.2)	Homo sapiens	Basic leucine zipper factors (bZIP)	Fos-related factors
MA0834.1	ATF7	Homo sapiens	Basic leucine zipper factors (bZIP)	Jun-related factors
MA0839.1	CREB3L1	Homo sapiens	Basic leucine zipper factors (bZIP)	CREB-related factors
MA0840.1	Creb5	Mus musculus	Basic leucine zipper factors (bZIP)	CREB-related factors
MA0841.1	NFE2	Homo sapiens	Basic leucine zipper factors (bZIP)	Jun-related factors
MA0915.1	dve	Drosophila melanogaster	Homeo domain factors
MA0916.1	Ets21C	Drosophila melanogaster	Tryptophan cluster factors	Ets-related factors
MA0917.1	gcm2	Drosophila melanogaster	GCM domain factors	GCM factors
MA1101.1	BACH2	Homo sapiens	Basic leucine zipper factors (bZIP)	Jun-related factors
MA1101.2	BACH2	Homo sapiens	Basic leucine zipper factors (bZIP)	Jun-related factors
MA1126.1	FOS::JUN(var.2)	Homo sapiens	Basic leucine zipper factors (bZIP)::Basic leucine zipper factors (bZIP)	Fos-related factors::Jun-related factors
MA1127.1	FOSB::JUN	Homo sapiens	Basic leucine zipper factors (bZIP)::Basic leucine zipper factors (bZIP)	Fos-related factors::Jun-related factors
MA1128.1	FOSL1::JUN	Homo sapiens	Basic leucine zipper factors (bZIP)::Basic leucine zipper factors (bZIP)	Fos-related factors::Jun-related factors
MA1129.1	FOSL1::JUN(var.2)	Homo sapiens	Basic leucine zipper factors (bZIP)::Basic leucine zipper factors (bZIP)	Fos-related factors::Jun-related factors
MA1130.1	FOSL2::JUN	Homo sapiens	Basic leucine zipper factors (bZIP)::Basic leucine zipper factors (bZIP)	Fos-related factors::Jun-related factors
MA1131.1	FOSL2::JUN(var.2)	Homo sapiens	Basic leucine zipper factors (bZIP)::Basic leucine zipper factors (bZIP)	Fos-related factors::Jun-related factors
MA1132.1	JUN::JUNB	Homo sapiens	Basic leucine zipper factors (bZIP)::Basic leucine zipper factors (bZIP)	Jun-related factors::Jun-related factors
MA1133.1	JUN::JUNB(var.2)	Homo sapiens	Basic leucine zipper factors (bZIP)::Basic leucine zipper factors (bZIP)	Jun-related factors::Jun-related factors
MA1134.1	FOS::JUNB	Homo sapiens	Basic leucine zipper factors (bZIP)::Basic leucine zipper factors (bZIP)	Fos-related factors::Jun-related factors
MA1135.1	FOSB::JUNB	Homo sapiens	Basic leucine zipper factors (bZIP)::Basic leucine zipper factors (bZIP)	Fos-related factors::Jun-related factors
MA1136.1	FOSB::JUNB(var.2)	Homo sapiens	Basic leucine zipper factors (bZIP)::Basic leucine zipper factors (bZIP)	Fos-related factors::Jun-related factors
MA1137.1	FOSL1::JUNB	Homo sapiens	Basic leucine zipper factors (bZIP)::Basic leucine zipper factors (bZIP)	Fos-related factors::Jun-related factors
MA1138.1	FOSL2::JUNB	Homo sapiens	Basic leucine zipper factors (bZIP)::Basic leucine zipper factors (bZIP)	Fos-related factors::Jun-related factors
MA1139.1	FOSL2::JUNB(var.2)	Homo sapiens	Basic leucine zipper factors (bZIP)::Basic leucine zipper factors (bZIP)	Fos-related factors::Jun-related factors
MA1140.1	JUNB(var.2)	Homo sapiens	Basic leucine zipper factors (bZIP)	Jun-related factors
MA1140.2	JUNB(var.2)	Homo sapiens	Basic leucine zipper factors (bZIP)	Jun-related factors
MA1141.1	FOS::JUND	Homo sapiens	Basic leucine zipper factors (bZIP)::Basic leucine zipper factors (bZIP)	Fos-related factors::Jun-related factors
MA1142.1	FOSL1::JUND	Homo sapiens	Basic leucine zipper factors (bZIP)::Basic leucine zipper factors (bZIP)	Fos-related factors::Jun-related factors
MA1143.1	FOSL1::JUND(var.2)	Homo sapiens	Basic leucine zipper factors (bZIP)::Basic leucine zipper factors (bZIP)	Fos-related factors::Jun-related factors
MA1144.1	FOSL2::JUND	Homo sapiens	Basic leucine zipper factors (bZIP)::Basic leucine zipper factors (bZIP)	Fos-related factors::Jun-related factors
MA1145.1	FOSL2::JUND(var.2)	Homo sapiens	Basic leucine zipper factors (bZIP)::Basic leucine zipper factors (bZIP)	Fos-related factors::Jun-related factors
MA1455.1	dmrt99B	Drosophila melanogaster	DM-type intertwined zinc finger factors	DMRT factors
MA1456.1	Dref	Drosophila melanogaster	C2H2 zinc finger factors	BED zinc finger factors
MA1457.1	grh	Drosophila melanogaster	Grainyhead domain factors	Grainyhead-related factors
MA1458.1	Hsf	Drosophila melanogaster	Heat shock factors	HSF factors
MA1459.1	M1BP	Drosophila melanogaster	C2H2 zinc finger factors
MA1460.1	pho	Drosophila melanogaster	C2H2 zinc finger factors
MA1461.1	sv	Drosophila melanogaster	Paired box factors
MA1462.1	vfl	Drosophila melanogaster	C2H2 zinc finger factors
MA1466.1	ATF6	Homo sapiens	Basic leucine zipper factors (bZIP)	Jun-related factors
MA1470.1	BACH2(var.2)	Homo sapiens	Basic leucine zipper factors (bZIP)	Jun-related factors
MA1474.1	CREB3L4	Homo sapiens	Basic leucine zipper factors (bZIP)	CREB-related factors
MA1475.1	CREB3L4(var.2)	Homo sapiens	Basic leucine zipper factors (bZIP)	CREB-related factors
MA1632.1	ATF2	Homo sapiens	Basic leucine zipper factors (bZIP)	Jun-related factors
MA1633.1	BACH1	Homo sapiens	Basic leucine zipper factors (bZIP)	Jun-related factors
MA1700.1	Clamp	Drosophila melanogaster	C2H2 zinc finger factors
MA1702.1	Pdp1	Drosophila melanogaster	Basic leucine zipper factors (bZIP)
